# Supplementary material for: The Use of Triphenyl Phosphonium Cation Enhances the Mitochondrial Antiplatelet Effect of the Compound Magnolol
Source: MDPI journal article supplement (doi:10.3390/ph16020210), 2023-01-30
Supplement: s1 [file s1]

## Supplementary data

### Platelet Aggregation Reversal

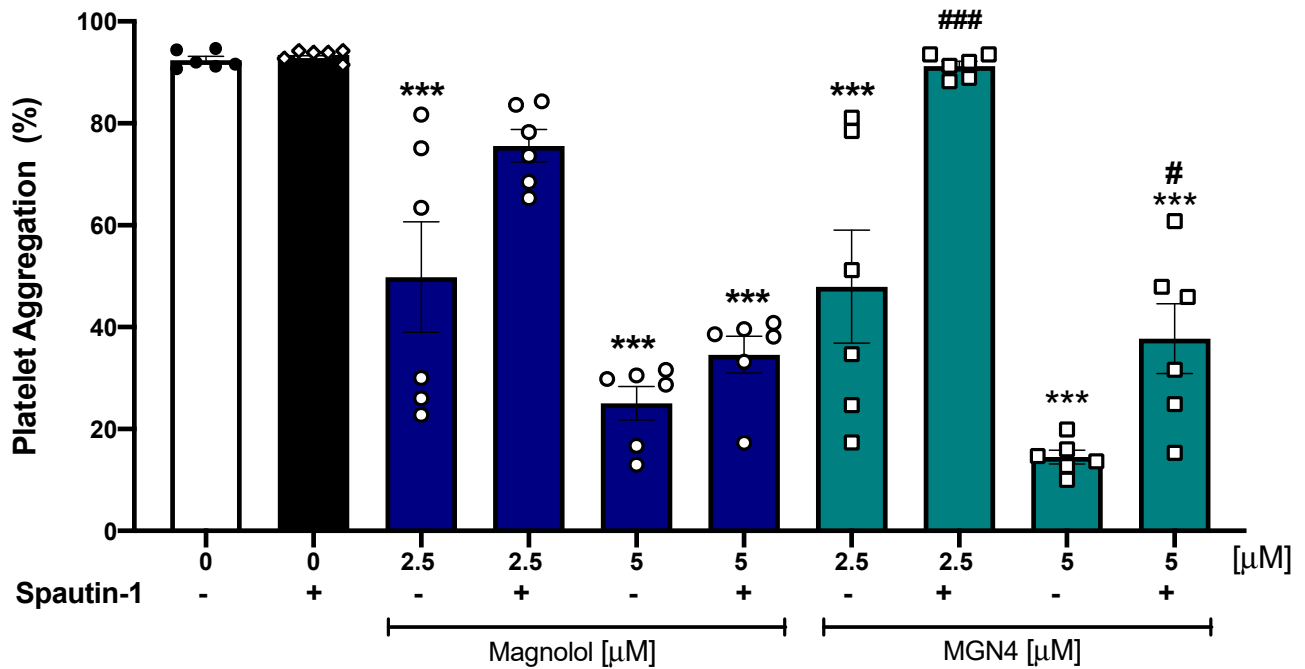

**Figure S1. Effect of Spautin-1 on platelet aggregation.** The aggregation assays were performed on washed platelets and the results are expressed as the percentage of aggregation after 5 minutes of preincubation with Spautin-1 and/or Magnolol or MGN4 followed by 5 minutes of reaction. Compounds were only tested at concentrations free of cytotoxicity. The results are expressed as mean  $\pm$  SEM ( $n=6$ ). Vehicle: DMSO 0.4%. The statistical analysis was performed using a one-way analysis of variance (ANOVA) and the Bonferroni post hoc test. \*\*\* $p<0.001$  vs vehicle (with and without Spautin-1). # $p<0.05$  and ### $p<0.001$  vs same concentration compound without Spautin-1

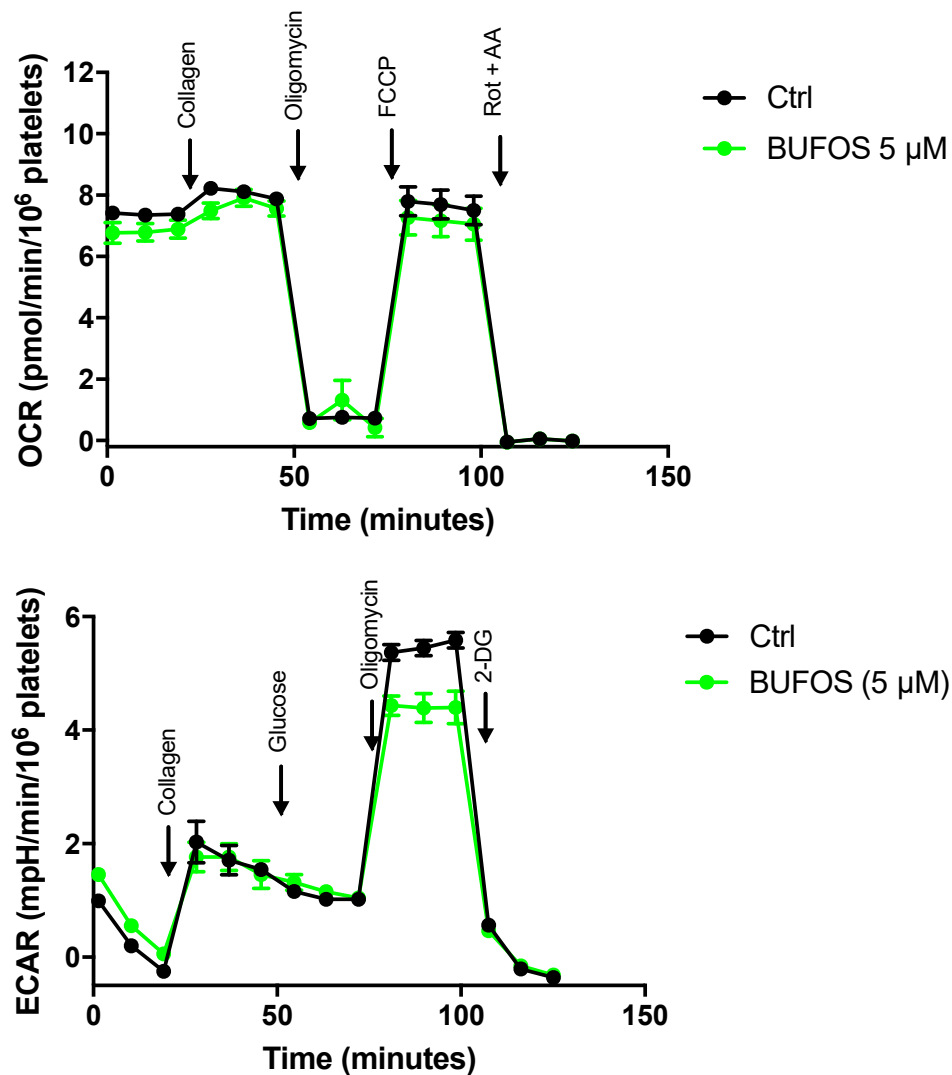

**Figure S2. Determination and quantification of respiration and acidification rate parameters of BUFOS.** The respiration and acidification experiments were done under the same experimental conditions as in figure 6 of the manuscript using bufos (5 μM) as a control of the effects of the TPP+ moiety. Significance was tested using two-way ANOVA with Dunnet's multiple comparisons test or unpaired Student's t-test. \*\*\*\* P < 0.0001.

**Table S1. Quantification of respiration and acidification rate parameters of BUFOS.**

| Rate                                                                                                  | Control   | BUFOS<br>(5 $\mu$ M) |
|-------------------------------------------------------------------------------------------------------|-----------|----------------------|
| <b>Basal</b> (OCR/ $10^6$ platelets)                                                                  | 7.4 (0.1) | 6.8 (0.6)            |
| <b>Collagen</b> (OCR/ $10^6$ platelets)                                                               | 8.4 (0.2) | 8.0 (0.5)            |
| <b>Activation</b> (OCR <sub>Collagen</sub> – OCR <sub>Basal</sub> )                                   | 1.0 (0.1) | 1.2 (0.5)            |
| <b>ATP-indep</b> (OCR/ $10^6$ platelets)                                                              | 0.7 (0.1) | 0.8 (0.5)            |
| <b>ATP-dep</b> (OCR/ $10^6$ platelets)                                                                | 6.6 (0.2) | 6.0 (0.2)            |
| <b>Maximum</b> (OCR/ $10^6$ platelets)                                                                | 7.7 (0.8) | 7.2 (1.1)            |
| <b>Spare</b> (OCR <sub>Maximum</sub> – OCR <sub>Basal</sub> )                                         | 0.3 (0.8) | 0.3 (0.9)            |
| <b>Non-mito</b> (OCR/ $10^6$ platelets)                                                               | 2.0 (0.8) | 1.9 (0.6)            |
| <b>Coupling efficiency</b> ((OCR <sub>Basal</sub> – OCR <sub>ATP-indep</sub> )/OCR <sub>Basal</sub> ) | 0.9 (0.1) | 0.9 (0.1)            |
| <b>Glycolysis</b> (mpH/min/ $10^6$ platelets)                                                         | 1.1 (0.1) | 1,2 (0.1)            |
| <b>Glycolytic capacity</b> (mpH/min/ $10^6$ platelets)                                                | 5.5 (0.2) | 4,4 (0.4) ****       |
| <b>Non-glycolytic acidification</b> (mpH/min / $10^6$ platelets)                                      | 1.3 (0.1) | 1,1 (0.1)            |

Means (SD),  $n \geq 3$  of respiration and glycolytic parameters. The value for the non-mitochondrial respiration rate and non-glycolytic acidification rate in each well was subtracted from all other values. Significance was tested using two-way ANOVA with Sidak's multiple comparisons tests or unpaired Student's t-test. \*\*  $P < 0.01$ , \*\*\*  $P < 0.001$ , \*\*\*\*  $P < 0.0001$ .
